# Supplementary material for: TDP-43 Proteinopathy Causes Broad Metabolic Alterations including TCA Cycle Intermediates and Dopamine Levels in Drosophila Models of ALS
Source: MDPI journal article supplement (doi:10.3390/metabo12020101), 2022-01-21
Supplement: s1 [file s1]

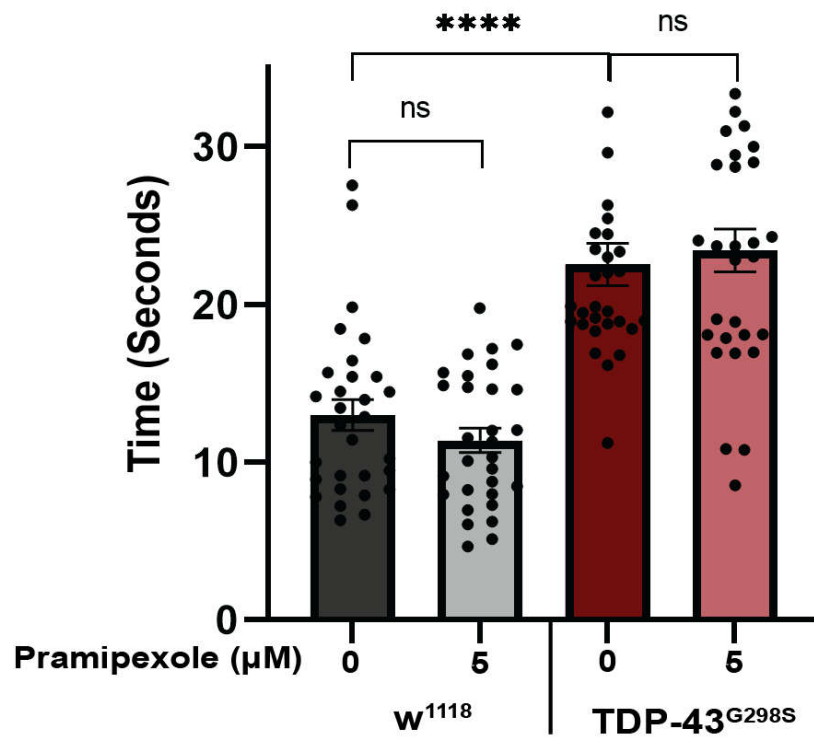

**Figure S1:** Larval turning assays for *Drosophila* expressing TDP-43<sup>G298S</sup> fed a cornmeal-based media supplemented with 5μM Pramipexole. DMSO was used as vehicle. N=30 larvae per treatment/per genotype. Kruskal-Wallis test was used to determine statistical significance. \*\*\*\* - P<sub>value</sub> < 0.0001.
