# Supplementary material for: TDP-43 Proteinopathy Causes Broad Metabolic Alterations including TCA Cycle Intermediates and Dopamine Levels in Drosophila Models of ALS
Source: Metabolites. 2022 Jan 21;12(2):101. doi: 10.3390/metabo12020101 (PMC8876928; doi:10.3390/metabo12020101)
Supplement: Supplementary file 1 [file metabolites-12-00101-s001.zip › Loganthan et al, Table S1_R1.xlsx]

## Sheet: Sheet1
Sub Pathway	Biochemical Name	TDP-43WT	Pvalue	TDP-43G298S	Pvalue	TDPG298S	Pvalue
		control		control		TDP-43WT
Glycine, Serine and Threonine Metabolism	glycine	0.77	0.0406	0.77	0.0406	1	0.9997
	N-acetylglycine	1.05	0.6516	1.73	0.0125	1.64	0.0362
	sarcosine (N-Methylglycine)	0.33	2.1621e-06	0.36	1.0104e-05	1.07	0.619
	betaine	1.29	0.0266	0.9	0.2783	0.7	0.0016
	serine	0.94	0.4171	1.03	0.6151	1.09	0.1925
	N-acetylserine	1.01	0.6283	0.97	0.816	0.96	0.801
	threonine	1.05	0.3277	1.08	0.1005	1.03	0.4925
	N-acetylthreonine	1.01	0.8232	1.14	0.3482	1.13	0.4729
	allo-threonine	0.97	0.8451	0.85	0.3672	0.88	0.4783
	homoserine	1.46	0.041	1.57	0.0208	1.08	0.7669
	O-acetylhomoserine	0.9	0.6612	0.97	0.8006	1.08	0.4907
Alanine and Aspartate Metabolism	alanine	0.93	0.3131	0.9	0.1116	0.96	0.547
	N-acetylalanine	1	0.782	1.18	0.1153	1.18	0.1902
	aspartate	0.85	0.1115	1.32	0.0058	1.56	5.6419e-05
	asparagine	1	0.9396	1.03	0.5834	1.03	0.5329
	N-acetylaspartate (NAA)	1.06	0.6561	1.08	0.4148	1.02	0.7092
	N-methylalanine	1.15	0.1297	0.97	0.8107	0.84	0.0815
Glutamate Metabolism	glutamate	0.97	0.6016	1.03	0.6446	1.06	0.3279
	glutamine	1.07	0.1605	1.13	0.0095	1.05	0.1998
	N-acetylglutamate	1.43	0.0564	1.43	0.0561	1	0.9976
	N-acetylglutamine	1.26	0.0356	1.36	0.0073	1.08	0.5129
	gamma-aminobutyrate (GABA)	0.74	0.358	0.91	0.8234	1.23	0.4845
	carboxyethyl-GABA*	1.02	0.8274	1.22	0.1468	1.19	0.2145
	pyroglutamine*	1.21	0.0213	0.94	0.4419	0.78	0.003
Histidine Metabolism	histidine	0.83	0.0914	1.05	0.6483	1.26	0.0347
	N-acetylhistidine	1.47	0.1499	1.33	0.3691	0.9	0.5779
	imidazole lactate	1.05	0.6084	0.5	0.0162	0.48	0.0525
	histamine	1.02	0.6777	0.92	0.8885	0.9	0.5788
	1-methylimidazoleacetate	0.95	0.4548	0.7	0.3787	0.74	0.8929
	4-imidazoleacetate	1.68	0.01	1.28	0.2126	0.76	0.156
Lysine Metabolism	lysine	0.89	0.3056	1.03	0.5896	1.16	0.1221
	N2-acetyllysine	0.93	0.4128	0.67	7.3937e-05	0.72	0.0008
	N6-acetyllysine	0.97	0.7913	1.06	0.3907	1.09	0.2637
	N-6-trimethyllysine	0.84	0.0902	0.95	0.623	1.12	0.2211
	saccharopine	0.73	0.0886	0.71	0.0662	0.97	0.8859
	2-aminoadipate	0.55	5.9603e-07	0.51	6.5816e-08	0.93	0.4759
	glutarate (pentanedioate)	0.65	0.0012	0.62	0.0004	0.95	0.6765
	3-methylglutarylcarnitine (1)	2.09	0.0005	1.32	0.1099	0.63	0.0352
	pipecolate	0.69	8.8214e-05	0.65	2.0159e-05	0.95	0.6284
	5-aminovalerate	0.84	0.8581	0.35	0.0729	0.42	0.05
Phenylalanine and Tyrosine Metabolism	phenylalanine	0.92	0.4805	1.03	0.5947	1.12	0.2195
	N-acetylphenylalanine	1.13	0.1578	1.02	0.5169	0.91	0.4359
	phenylpyruvate	0.93	0.7262	1.04	0.542	1.11	0.7942
	phenyllactate (PLA)	1.09	0.3212	0.68	0.5305	0.62	0.1099
	phenylacetate	1.56	0.1212	1.2	0.2947	0.77	0.6034
	phenylacetylglycine	0.72	0.0697	0.39	0.0077	0.54	0.3478
	phenylacetylglutamine	0.97	0.8041	4.03	0.0025	4.15	0.0048
	tyrosine	0.48	0.0487	0.59	0.0649	1.21	0.8928
	N-acetyltyrosine	0.59	0.1061	0.41	0.0013	0.69	0.0735
	tyramine	0.84	0.8247	0.85	0.3915	1.01	0.5235
	4-hydroxyphenylpyruvate	0.82	0.8056	1.3	0.1585	1.58	0.1001
	3-(4-hydroxyphenyl)lactate	0.26	0.0047	0.23	0.0017	0.9	0.7038
	dihydoxyphenylalanine (L-DOPA)	0.45	0.0306	0.48	0.0498	1.07	0.8264
	dopamine	0.34	0.1442	0.28	0.0371	0.82	0.5055
	3-methoxytyrosine	1.41	0.0055	1.2	0.1164	0.85	0.1878
	3,4-dihydroxyphenylacetate	0.51	0.0297	0.43	0.0126	0.85	0.7191
	5,6-dihydroxyindole	0.86	0.6066	0.93	0.5115	1.08	0.8867
	3-iodotyrosine	0.42	1.4661e-07	0.7	0.013	1.68	0.0004
	o-Tyrosine	0.85	0.1738	0.96	0.7339	1.13	0.303
Tryptophan Metabolism	tryptophan	0.91	0.4949	1.07	0.365	1.18	0.1168
	N-acetyltryptophan	1.43	0.2165	0.6	0.1346	0.42	0.0084
	indolelactate	1.5	0.2054	0.5	0.7052	0.33	0.1034
	indoleacetate	1.49	0.2001	0.76	0.9904	0.51	0.1961
	kynurenine	0.71	0.0559	1.1	0.5705	1.55	0.0152
	kynurenate	0.65	0.0035	0.59	0.0006	0.91	0.541
	3-hydroxykynurenine	1.83	0.0088	2.92	4.9622e-05	1.59	0.0749
	xanthurenate	0.79	0.3635	0.95	0.81	1.2	0.5019
	N-acetylserotonin	1.24	0.3638	1.29	0.2661	1.04	0.8351
Leucine, Isoleucine and Valine Metabolism	leucine	0.96	0.9406	1.09	0.2812	1.14	0.25
	N-acetylleucine	0.93	0.9081	0.69	0.1636	0.75	0.1327
	4-methyl-2-oxopentanoate	1.27	0.1663	1.33	0.1152	1.05	0.8415
	isovalerate	1.12	0.3843	1.12	0.369	0.99	0.977
	beta-hydroxyisovalerate	1.07	0.7659	0.6	0.0952	0.56	0.0516
	alpha-hydroxyisovalerate	1.04	0.7122	0.9	0.5623	0.87	0.3451
	methylsuccinate	1.23	0.1531	1.05	0.8662	0.86	0.2053
	isoleucine	0.95	0.8289	1.08	0.327	1.13	0.2336
	N-acetylisoleucine	0.94	0.9216	0.63	0.0535	0.67	0.0659
	3-methyl-2-oxovalerate	1.45	0.1129	1.61	0.0597	1.11	0.7512
	2-hydroxy-3-methylvalerate	1.61	0.1102	1.32	0.3075	0.82	0.5505
	3-hydroxy-2-ethylpropionate	1.58	0.0193	1.2	0.3553	0.76	0.1387
	ethylmalonate	1.6	0.0036	1.27	0.1036	0.8	0.1567
	valine	0.95	0.7841	1.04	0.5221	1.1	0.3624
	N-acetylvaline	1.13	0.3276	0.96	0.8994	0.84	0.3927
	3-methyl-2-oxobutyrate	1.06	0.4427	0.76	0.2476	0.71	0.0588
	isobutyrylcarnitine	0.51	0.0007	0.5	0.0004	0.97	0.8421
	isobutyrylglycine	0.88	0.69	0.66	0.0776	0.75	0.1658
	3-hydroxyisobutyrate	0.46	1.4415e-05	0.51	8.7775e-05	1.1	0.5546
	alpha-hydroxyisocaproate	0.78	0.6754	0.57	0.0985	0.73	0.2109
Methionine, Cysteine, SAM and Taurine Metabolism	methionine	0.9	0.5046	1.1	0.3231	1.22	0.1024
	N-acetylmethionine	1.08	0.4512	1.53	0.0004	1.41	0.0034
	N-formylmethionine	0.76	0.0174	0.81	0.0703	1.07	0.5344
	methionine sulfone	1.49	0.1868	1.03	0.8474	0.69	0.257
	methionine sulfoxide	0.64	0.0004	0.67	0.0017	1.05	0.6329
	S-adenosylmethionine (SAM)	0.48	5.8532e-05	0.63	0.0076	1.32	0.0932
	S-adenosylhomocysteine (SAH)	0.96	0.781	1.42	0.4795	1.48	0.3266
	homocysteine	0.65	0.0392	0.59	0.0081	0.9	0.5098
	cystathionine	0.65	0.0879	0.57	0.0145	0.88	0.4199
	2-aminobutyrate	0.6	2.6803e-06	0.67	0.0001	1.12	0.2252
	2-hydroxybutyrate (AHB)	0.69	0.001	0.68	0.0008	0.99	0.9373
	cysteine	1.08	0.5425	1.28	0.0549	1.19	0.1795
	N-acetylcysteine	1.92	0.0181	1.87	0.0191	0.98	0.9821
	taurine	0.95	0.4428	0.93	0.2633	0.98	0.7207
	N-acetyltaurine	1.33	0.0411	1.02	0.7219	0.77	0.0869
Urea cycle; Arginine and Proline Metabolism	arginine	1	0.9919	1.08	0.1658	1.08	0.1688
	ornithine	1.11	0.5417	1.56	0.0259	1.41	0.0964
	proline	1.04	0.518	1.09	0.206	1.04	0.5295
	citrulline	1.08	0.7286	1.04	0.7404	0.96	0.9874
	argininosuccinate	1.03	0.7117	1.1	0.1294	1.07	0.2459
	homocitrulline	0.76	0.0002	0.77	0.0004	1.01	0.8105
	dimethylarginine (SDMA + ADMA)	0.87	0.1604	1.05	0.4961	1.2	0.0409
	N-acetylarginine	1	0.8962	0.66	0.0003	0.66	0.0005
	N-acetylproline	1.22	0.0206	1.01	0.8467	0.83	0.0323
	N-delta-acetylornithine	1.14	0.4878	1	0.8384	0.88	0.6231
	pro-hydroxy-pro	0.97	0.8724	0.99	0.9075	1.02	0.782
Polyamine Metabolism	acisoga	3.56	0.0166	1.13	0.8739	0.32	0.0242
	putrescine	0.92	0.4337	1.3	0.0348	1.41	0.0051
	spermidine	0.93	0.4537	1.25	0.028	1.35	0.0043
	5-methylthioadenosine (MTA)	0.6	2.9107e-10	0.63	6.0077e-09	1.06	0.3053
	N-acetylputrescine	1.27	0.5255	0.56	0.0322	0.44	0.0069
	4-acetamidobutanoate	1.18	0.2439	1.09	0.5823	0.93	0.5329
Guanidino and Acetamido Metabolism	4-guanidinobutanoate	1.61	0.0729	1.07	0.5499	0.67	0.2215
Glutathione Metabolism	5-oxoproline	1.02	0.7775	0.99	0.9752	0.97	0.7538
	ophthalmate	1.2	0.2633	1.46	0.036	1.22	0.3044
Gamma-glutamyl Amino Acid	gamma-glutamylalanine	1.16	0.1383	1.27	0.0222	1.1	0.3877
	gamma-glutamylisoleucine*	0.94	0.762	0.96	0.88	1.01	0.8792
	gamma-glutamylleucine	1.03	0.6871	1.02	0.7275	0.99	0.9565
	gamma-glutamylphenylalanine	1.12	0.3677	0.98	0.7759	0.88	0.5357
	gamma-glutamylthreonine*	1.05	0.5731	0.99	0.9288	0.95	0.5143
	gamma-glutamyltryptophan	0.79	0.5334	1.12	0.62	1.41	0.2663
	gamma-glutamyltyrosine	0.54	0.0461	0.4	0.0147	0.74	0.6218
	gamma-glutamylvaline	1.09	0.458	0.85	0.4551	0.77	0.141
Dipeptide	alanylalanine	0.93	0.8384	1.88	0.0008	2.01	0.0005
	alanylisoleucine	0.37	0.0127	3.79	0.0041	10.38	1.8153e-06
	alanylleucine	0.84	0.5655	2.37	0.0016	2.83	0.0003
	alanylphenylalanine	0.61	0.0229	0.72	0.1389	1.18	0.394
	alanylproline	0.67	0.4264	1.97	0.0024	2.93	0.0002
	alanyltryptophan	0.7	0.1329	2.07	0.0007	2.97	7.4276e-06
	alanyltyrosine	0.45	0.0046	1.56	0.0699	3.47	2.0801e-05
	alanylvaline	0.67	0.1044	1.62	0.0173	2.42	0.0002
	alpha-glutamylglutamate	1.06	0.5797	1.48	0.002	1.4	0.0089
	alpha-glutamyltryptophan	0.75	0.4777	2.63	0.0019	3.49	0.0002
	alpha-glutamyltyrosine	0.91	0.8377	3.85	0.0001	4.23	0.0002
	arginylisoleucine	0.66	0.036	1.9	0.0023	2.87	3.6077e-06
	arginylleucine	0.76	0.091	1.9	0.0002	2.51	7.8054e-07
	arginylphenylalanine	1.22	0.2684	2.61	0.0002	2.14	0.0038
	arginylproline	1.04	0.794	2.35	5.3708e-05	2.26	0.0001
	asparagylisoleucine	0.9	0.7036	1.73	0.0132	1.93	0.005
	asparagylleucine	0.88	0.6706	1.9	0.0035	2.14	0.0011
	asparagylvaline	0.9	0.6085	2.14	0.0002	2.36	3.3484e-05
	aspartylleucine	0.91	0.5961	2.47	3.4917e-06	2.7	6.7328e-07
	aspartylphenylalanine	0.82	0.7733	4.26	0.0001	5.17	6.0169e-05
	aspartylvaline	1.31	0.0766	2.81	1.4368e-07	2.14	3.8458e-05
	cyclo(gly-pro)	0.9	0.1254	0.75	0.0001	0.83	0.0089
	glutamine-leucine	0.82	0.3839	2.19	0.0006	2.68	4.6682e-05
	glycylalanine	1.07	0.6335	2.69	2.1105e-05	2.52	9.0274e-05
	glycylglycine	0.93	0.7989	1.12	0.307	1.2	0.2043
	glycylisoleucine	0.9	0.6289	1.34	0.1004	1.48	0.0364
	glycylleucine	0.95	0.7349	1.51	0.001	1.58	0.0004
	glycylmethionine	0.84	0.5384	1.88	0.0108	2.23	0.0021
	glycylphenylalanine	0.67	0.0257	1.53	0.0108	2.31	1.4277e-05
	glycylproline	1.02	0.7478	1.29	0.0041	1.26	0.0094
	glycyltryptophan	0.77	0.0118	1.07	0.4416	1.39	0.0015
	glycyltyrosine	0.62	0.2198	1.61	0.0986	2.61	0.0056
	glycylvaline	0.89	0.4586	1.41	0.0106	1.59	0.0015
	histidylglycine	0.65	0.0465	0.72	0.1706	1.12	0.5113
	histidylisoleucine	1.04	0.6464	2.33	1.5608e-06	2.23	6.4794e-06
	histidylleucine	0.98	0.9798	3.11	5.9934e-06	3.17	5.5424e-06
	isoleucylalanine	0.64	0.0473	1.15	0.5395	1.78	0.0112
	isoleucylarginine	1.14	0.613	2.44	0.0288	2.14	0.0857
	isoleucylasparagine	0.96	0.3171	1.04	0.7911	1.07	0.4595
	isoleucylaspartate	1.12	0.2947	1.49	0.0034	1.33	0.0459
	isoleucylglutamate	1.03	0.7674	1.31	0.0594	1.27	0.1079
	isoleucylglutamine	0.74	0.103	1.18	0.3263	1.58	0.0114
	isoleucylglycine	0.86	0.3325	1.43	0.018	1.67	0.0014
	isoleucylisoleucine	0.1	5.6e-14	0.16	1.0058e-11	1.54	0.0507
	isoleucylleucine	0.7	0.1179	1.51	0.0677	2.16	0.0013
	isoleucylmethionine	0.94	0.9839	7.21	0.0009	7.66	0.0009
	isoleucylserine	0.84	0.5978	1.4	0.0662	1.66	0.0204
	isoleucylthreonine	0.99	0.8824	1.72	0.0086	1.75	0.0125
	isoleucyltyrosine	0.47	0.0408	2.66	0.0086	5.6	2.035e-05
	isoleucylvaline	0.77	0.3204	1.78	0.0259	2.31	0.002
	leucylalanine	0.96	0.9569	1.38	0.0707	1.44	0.079
	leucylarginine	1.36	0.2292	3.01	0.0003	2.21	0.0088
	leucylasparagine	1.91	0.2403	2.99	0.047	1.56	0.3937
	leucylglutamate	0.95	0.8023	1.5	0.0327	1.58	0.0182
	leucylglycine	0.97	0.991	1.44	0.0345	1.48	0.0354
	leucylisoleucine	0.99	0.6055	1.53	0.0562	1.54	0.1551
	leucylleucine	0.89	0.7935	1.51	0.0611	1.69	0.0346
	leucylmethionine	1.1	0.9091	1.94	0.1152	1.77	0.1425
	leucylserine	2.57	0.0341	3.17	0.0663	1.24	0.7589
	lysylisoleucine	0.96	0.8519	2.37	2.3817e-05	2.46	1.3419e-05
	lysylleucine	0.73	0.2168	2.74	0.0002	3.75	3.5948e-06
	lysylphenylalanine	1	0.5274	0.9	0.7371	0.9	0.7661
	phenylalanylalanine	1.87	0.0239	8.61	2.5934e-08	4.61	3.533e-05
	phenylalanylarginine	1.64	0.0459	4.04	5.4319e-06	2.47	0.0024
	phenylalanylaspartate	1.05	0.5611	1.77	0.0002	1.68	0.0011
	phenylalanylglutamate	1.22	0.2244	2.03	0.0005	1.66	0.0131
	phenylalanylglycine	0.77	0.0669	1.16	0.2276	1.51	0.0036
	phenylalanylhistidine	0.51	0.2863	1.79	0.4028	3.5	0.0616
	phenylalanylisoleucine	0.88	0.7923	3.15	0.0144	3.57	0.0074
	phenylalanylleucine	1.02	0.8043	5.89	4.5105e-05	5.75	9.5524e-05
	phenylalanylproline	1	0.9582	2.05	0.0063	2.06	0.0055
	phenylalanylserine	0.97	0.7256	2.66	0.0019	2.75	0.0049
	phenylalanyltryptophan	0.76	0.5856	4.3	0.0004	5.64	8.7217e-05
	phenylalanylvaline	1.02	0.7209	2.04	0.0005	2.01	0.0013
	prolylalanine	1	0.8156	1.84	8.167e-05	1.84	0.0002
	prolylarginine	0.82	0.3585	1.69	0.0374	2.07	0.0038
	prolylglutamate	1.22	0.0759	1.4	0.006	1.15	0.2809
	prolylglutamine	0.9	0.6221	1.86	7.0312e-05	2.06	1.5572e-05
	prolylglycine	1.01	0.715	1.05	0.4868	1.04	0.7399
	prolylisoleucine	0.83	0.5809	1.6	0.0219	1.93	0.0055
	prolylleucine	0.91	0.7177	1.82	0.0002	2	7.6624e-05
	prolylphenylalanine	1.03	0.7165	2.07	0.0001	2	0.0004
	prolylproline	1.08	0.7576	1.55	0.0674	1.44	0.1241
	prolylserine	0.73	0.0996	2.02	0.0003	2.78	1.6476e-06
	prolyltryptophan	0.88	0.7109	2.64	8.5602e-05	2.99	2.7716e-05
	prolyltyrosine	0.74	0.4822	1.59	0.1413	2.16	0.0332
	prolylvaline	0.92	0.6674	1.6	0.0004	1.74	0.0001
	pyroglutamylglycine	1.28	0.0798	0.91	0.9612	0.71	0.0722
	pyroglutamylvaline	1.16	0.2427	0.96	0.9284	0.83	0.2798
	serylisoleucine	0.92	0.8294	2.13	0.0045	2.3	0.0025
	serylleucine	0.86	0.5114	1.59	0.0384	1.86	0.0079
	serylmethionine	1.06	0.7125	2.94	0.0004	2.77	0.0011
	serylphenyalanine	0.8	0.452	2.86	0.0001	3.55	1.1218e-05
	seryltyrosine	0.45	0.0423	3.34	0.0011	7.41	1.997e-06
	serylvaline	0.79	0.3161	1.53	0.0684	1.93	0.0064
	threonylalanine	1.19	0.567	1.22	0.5417	1.02	0.9696
	threonylglutamate	1.14	0.3015	1.77	0.0004	1.55	0.0071
	threonylglutamine	1.03	0.8425	4.01	0.0018	3.87	0.0032
	threonylisoleucine	1.1	0.5046	2.24	0.003	2.03	0.0169
	threonylleucine	1.02	0.8122	2.14	0.0016	2.1	0.003
	threonylmethionine	0.88	0.6885	3.38	0.0007	3.85	0.0002
	threonylphenylalanine	1.01	0.9005	2.52	0.0022	2.49	0.003
	threonylproline	1.14	0.4267	1.51	0.0481	1.33	0.2221
	threonylserine	1.28	0.1784	2.97	0.0021	2.32	0.0607
	threonylvaline	1.16	0.3546	2.09	0.0005	1.81	0.0065
	tryptophylalanine	1	1	1.89	0.0086	1.89	0.0086
	tryptophylglutamate	1.11	0.4707	2.31	1.6784e-05	2.07	0.0002
	tryptophylglycine	0.81	0.6548	4.57	0.0014	5.62	0.0004
	tryptophylleucine	1.81	0.1639	7.07	0.0011	3.91	0.039
	tryptophylvaline	0.92	0.9727	8.94	0.0001	9.72	0.0001
	tyrosylalanine	0.56	0.053	0.88	0.6396	1.55	0.1351
	tyrosylarginine	0.55	0.3301	3.99	0.0467	7.29	0.0043
	tyrosylglutamate	0.95	0.8728	1.43	0.0758	1.51	0.0543
	tyrosylglutamine	1	0.9995	2.76	0.0669	2.76	0.0669
	tyrosylglycine	0.55	0.1506	1.5	0.403	2.7	0.0264
	tyrosylisoleucine	0.49	0.0013	1.16	0.3714	2.39	9.5409e-05
	tyrosylleucine	0.71	0.7114	2.81	0.0119	3.95	0.0046
	tyrosyllysine	0.68	0.8102	1.75	0.238	2.58	0.158
	tyrosyltyrosine	0.6	0.2715	0.36	0.0195	0.59	0.1926
	tyrosylvaline	1	1	7.07	0.018	7.07	0.018
	valylalanine	0.86	0.6558	1.58	0.043	1.84	0.0153
	valylarginine	1.54	0.4205	5.21	0.0021	3.39	0.0169
	valylaspartate	1.22	0.1629	1.44	0.0193	1.18	0.3124
	valylglutamate	0.94	0.6465	1.6	0.0012	1.7	0.0003
	valylglutamine	0.9	0.3436	2.1	0.0493	2.34	0.005
	valylglycine	0.82	0.5216	1.19	0.5181	1.45	0.2019
	valylisoleucine	0.81	0.3285	1.12	0.5198	1.38	0.1096
	valylleucine	0.72	0.208	1.26	0.3359	1.74	0.0301
	valyllysine	1.52	0.5212	8.5	0.0024	5.6	0.0127
	valylmethionine	1.08	0.9793	3.17	0.0065	2.93	0.007
	valylphenylalanine	0.94	0.8676	4.03	0.0025	4.3	0.0016
	valylserine	0.5	0.6206	1.88	0.1212	3.74	0.0441
	valylthreonine	0.88	0.3941	1.13	0.4129	1.29	0.0995
	valyltryptophan	0.95	0.9145	2.13	0.6068	2.25	0.6834
	valyltyrosine	0.55	0.112	1.35	0.2228	2.45	0.0068
	valylvaline	0.61	0.0399	0.95	0.8564	1.57	0.059
	cis-Cyclo[L-ala-L-Pro]	1	0.8799	0.63	0.0336	0.63	0.0237
	leucylglutamine*	1.21	0.1123	1.86	8.3031e-05	1.53	0.008
Polypeptide	pro-pro-pro	0.82	0.7514	0.68	0.2441	0.82	0.3928
	leu-leu-leu	1.25	0.2059	1.53	0.0547	1.23	0.49
Pentose Phosphate Pathway	6-phosphogluconate	0.62	0.0174	1.1	0.7614	1.79	0.0082
	sedoheptulose-7-phosphate	1.16	0.5718	2.38	0.0084	2.04	0.0328
	ribulose/xylulose 5-phosphate	0.79	0.211	0.58	0.0107	0.73	0.164
Pentose Metabolism	ribulose	1.13	0.1944	0.91	0.8221	0.8	0.2805
	ribose	1.3	0.0543	0.9	0.7074	0.69	0.0234
	ribitol	0.61	0.0433	0.58	0.0332	0.95	0.9055
	ribonate	0.95	0.6298	1.03	0.7813	1.08	0.4488
	xylonate	0.73	0.0615	1.11	0.7787	1.52	0.0333
	xylose	0.9	0.6029	0.75	0.171	0.83	0.389
	xylitol	0.89	0.1002	0.85	0.0266	0.96	0.5354
	threitol	1.4	0.4369	2.18	0.0355	1.56	0.1704
	arabitol	1.09	0.5878	1.3	0.194	1.2	0.4425
Glycogen Metabolism	maltopentaose	0.86	0.4789	1.23	0.3532	1.42	0.1064
	maltotetraose	0.95	0.8841	0.98	0.8168	1.03	0.706
	maltotriose	1.02	0.9606	0.95	0.7228	0.93	0.6862
	maltose	0.85	0.0094	0.97	0.6114	1.14	0.0318
	isomaltose	0.83	0.2842	0.91	0.6496	1.09	0.5333
Disaccharides and Oligosaccharides	trehalose	1.17	0.1078	1.04	0.6138	0.89	0.2618
Fructose, Mannose and Galactose Metabolism	fructose	1.1	0.4677	1.05	0.7955	0.95	0.6391
	sorbose	1.16	0.3647	1.11	0.4997	0.96	0.8147
	sorbitol	0.8	0.0935	0.81	0.1236	1.02	0.885
	mannose	0.84	0.297	0.98	0.9304	1.17	0.2593
	mannose-6-phosphate	1.15	0.6242	1.38	0.1272	1.2	0.293
	galactose 1-phosphate	0.78	0.3283	0.92	0.82	1.18	0.4511
	galactonate	0.76	0.0366	0.95	0.8452	1.24	0.0561
Nucleotide Sugar	UDP-glucuronate	0.82	0.4406	0.85	0.5114	1.04	0.9079
	UDP-N-acetylglucosamine	0.76	0.0224	0.86	0.2222	1.12	0.2605
Aminosugar Metabolism	glucosamine-6-phosphate	0.94	0.911	1.33	0.1329	1.42	0.1628
	glucuronate	0.83	0.007	0.6	1.1811e-09	0.72	6.731e-06
	N-acetylglucosamine	0.76	0.0519	0.8	0.1516	1.06	0.589
	N-acetylglucosamine 6-phosphate	0.68	2.241e-05	0.84	0.0424	1.24	0.0089
	N-acetyl-glucosamine 1-phosphate	0.78	0.082	1.07	0.7076	1.37	0.0369
	erythronate*	0.98	0.8215	0.91	0.3481	0.93	0.4742
Advanced Glycation End-product	N6-carboxymethyllysine	0.91	0.2244	0.93	0.4476	1.02	0.6423
TCA Cycle	citrate	1.25	0.4526	3.6	9.9417e-06	2.89	9.9402e-05
	aconitate [cis or trans]	1.04	0.6756	1.6	0.0252	1.54	0.0637
	alpha-ketoglutarate	1.2	0.1466	1.13	0.2744	0.95	0.7108
	succinylcarnitine	0.41	0.1344	0.47	0.3817	1.16	0.5224
	succinate	0.89	0.303	0.85	0.1375	0.95	0.6384
	fumarate	1.93	0.0363	2.12	0.0032	1.1	0.3306
	malate	0.99	0.9863	2.22	0.003	2.24	0.0029
	tricarballylate	1.39	0.0822	1.42	0.1318	1.02	0.8071
	2-methylcitrate	1.15	0.4554	1.74	0.0005	1.51	0.0044
Oxidative Phosphorylation	phosphate	0.8	0.0018	0.77	0.0004	0.96	0.5712
Medium Chain Fatty Acid	caprylate (8:0)	0.91	0.322	0.84	0.0947	0.92	0.4809
	caprate (10:0)	1.13	0.1394	1.03	0.6364	0.91	0.3076
	10-undecenoate (11:1n1)	1	0.881	0.94	0.6643	0.94	0.7758
	laurate (12:0)	1.12	0.2719	1.06	0.4854	0.95	0.6836
	5-dodecenoate (12:1n7)	0.88	0.2037	0.82	0.0508	0.93	0.4725
Polyunsaturated Fatty Acid (n3 and n6)	linoleate (18:2n6)	0.83	0.524	0.63	0.0743	0.75	0.2399
	linolenate [alpha or gamma; (18:3n3 or 6)]	0.72	0.204	0.57	0.0232	0.79	0.288
Fatty Acid, Branched	13-methylmyristic acid	1.36	0.4085	1.51	0.2241	1.11	0.691
	15-methylpalmitate (isobar with 2-methylpalmitate)	1.45	0.0358	1.25	0.2079	0.86	0.3749
	17-methylstearate	1.41	0.1627	1.11	0.6632	0.79	0.3307
Fatty Acid, Dicarboxylate	2-hydroxyglutarate	0.92	0.0551	0.96	0.3101	1.04	0.347
	4-hydroxy-2-oxoglutaric acid	1	0.7107	1.17	0.3506	1.18	0.1953
	adipate	1.08	0.5567	0.88	0.3819	0.82	0.148
	sebacate (decanedioate)	0.65	0.0036	0.45	1.281e-06	0.69	0.011
	1,11-undecanedicarboxylate	0.86	0.6352	0.73	0.1629	0.85	0.3505
	dodecanedioate	0.77	0.3615	0.54	0.0258	0.7	0.1696
	tetradecanedioate	0.88	0.8723	0.69	0.302	0.79	0.382
	hexadecanedioate	0.8	0.4458	0.63	0.0509	0.78	0.2198
Fatty Acid, Amino	2-aminoheptanoate	1.09	0.5053	1.03	0.8438	0.95	0.638
	2-aminooctanoate	1.87	0.0031	1.76	0.0062	0.94	0.7901
Fatty Acid Synthesis	malonate (propanedioate)	0.89	0.1711	1.04	0.624	1.17	0.0667
Fatty Acid Metabolism (also BCAA Metabolism)	propionylcarnitine	0.92	0.8583	1.05	0.6692	1.14	0.5453
	propionylglycine	2	0.0033	1.64	0.0099	0.82	0.6766
	methylmalonate (MMA)	0.75	0.0678	0.83	0.2157	1.11	0.5374
Fatty Acid Metabolism(Acyl Glycine)	N-octanoylglycine	2.62	0.0132	1.13	0.5808	0.43	0.0477
	N-palmitoyl glycine	0.6	0.223	0.67	0.4364	1.13	0.6533
Fatty Acid, Monohydroxy	4-hydroxybutyrate (GHB)	0.54	0.0804	1.19	0.7578	2.21	0.1453
	3-hydroxypropanoate	0.94	0.6507	0.84	0.1969	0.89	0.3964
	3-hydroxyoctanoate	0.84	0.1391	0.83	0.1265	0.99	0.9592
	3-hydroxydecanoate	0.77	0.0886	0.85	0.2939	1.1	0.4977
	3-hydroxylaurate	1.02	0.7944	0.89	0.2543	0.87	0.1639
	16-hydroxypalmitate	0.75	0.0062	0.8	0.0395	1.07	0.4469
	13-HODE + 9-HODE	1.05	0.5595	0.91	0.5808	0.86	0.2592
Fatty Acid, Dihydroxy	9,10-DiHOME	0.77	0.2302	0.54	0.0018	0.7	0.0381
Endocannabinoid	oleic ethanolamide	0.81	0.7137	0.51	0.3887	0.63	0.6182
	myristoyl ethanolamide	0.73	0.4902	0.61	0.3698	0.84	0.8339
	N-oleoyltaurine	0.59	0.6987	0.71	0.9771	1.2	0.72
Inositol Metabolism	myo-inositol	0.78	0.0008	0.8	0.0024	1.02	0.7071
	inositol 1-phosphate (I1P)	0.94	0.3215	1.04	0.5893	1.1	0.1299
Phospholipid Metabolism	choline	1.02	0.6531	0.9	0.3096	0.88	0.1466
	choline phosphate	1.06	0.4222	0.99	0.9295	0.94	0.3736
	glycerophosphorylcholine (GPC)	0.79	0.0351	0.64	0.0004	0.82	0.0886
	ethanolamine	0.86	0.2945	0.78	0.079	0.91	0.4616
	phosphoethanolamine	0.71	0.0027	0.76	0.0129	1.06	0.5467
	cytidine-5'-diphosphoethanolamine	0.83	0.0302	0.88	0.1275	1.06	0.4902
	glycerophosphoethanolamine	0.96	0.547	0.92	0.4089	0.96	0.8212
	glycerophosphoinositol*	0.51	0.1368	0.62	0.4237	1.21	0.4807
Lysolipid	1-myristoylglycerophosphocholine (14:0)	0.79	0.1236	0.72	0.0499	0.92	0.6539
	2-myristoylglycerophosphocholine*	1.21	0.1982	0.82	0.1197	0.67	0.0062
	1-myristoleoylglycerophosphocholine (14:1) *	1.04	0.8362	0.67	0.0056	0.64	0.0032
	2-myristoleoylglycerophosphocholine*	1.04	0.7464	0.71	0.0021	0.68	0.0008
	1-pentadecanoylglycerophosphocholine (15:0)*	0.61	0.1389	0.4	0.013	0.66	0.278
	1-palmitoylglycerophosphocholine (16:0)	0.7	0.0436	0.76	0.1435	1.08	0.5552
	2-palmitoylglycerophosphocholine*	1.13	0.643	0.95	0.8018	0.84	0.476
	1-palmitoleoylglycerophosphocholine (16:1)*	1.02	0.9697	0.83	0.3159	0.81	0.3342
	2-palmitoleoylglycerophosphocholine*	1.16	0.3899	0.83	0.205	0.72	0.0374
	1-margaroylglycerophosphocholine (17:0)	0.43	0.0747	0.36	0.0417	0.84	0.7838
	1-stearoylglycerophosphocholine (18:0)	0.79	0.2572	0.71	0.116	0.9	0.6488
	1-oleoylglycerophosphocholine (18:1)	1.14	0.5369	0.89	0.5263	0.78	0.2146
	2-oleoylglycerophosphocholine*	1.17	0.4559	0.96	0.8921	0.82	0.3791
	1-linoleoylglycerophosphocholine (18:2n6)	1.04	0.9996	0.8	0.2254	0.77	0.2252
	2-linoleoylglycerophosphocholine*	1.01	0.9775	0.75	0.1249	0.75	0.1317
	1-linolenoylglycerophosphocholine (18:3n3)*	1.29	0.5807	1.09	0.7866	0.85	0.7775
	2-linolenoylglycerophosphocholine(18:3n3)*	0.93	0.4699	0.51	0.039	0.54	0.1666
	1-myristoylglycerophosphoethanolamine	0.67	0.0423	0.71	0.0837	1.06	0.746
	2-myristoylglycerophosphoethanolamine*	1.16	0.4438	0.83	0.2815	0.71	0.07
	1-palmitoylglycerophosphoethanolamine	0.75	0.3369	0.62	0.135	0.83	0.5818
	2-palmitoylglycerophosphoethanolamine*	0.54	0.3394	0.59	0.371	1.09	0.9506
	1-margaroylglycerophosphoethanolamine*	0.65	0.3198	0.46	0.0326	0.71	0.2325
	1-stearoylglycerophosphoethanolamine	0.76	0.6712	0.61	0.2184	0.8	0.4151
	2-stearoylglycerophosphoethanolamine*	0.49	0.3703	0.43	0.2736	0.87	0.839
	1-oleoylglycerophosphoethanolamine	1.08	0.5787	0.75	0.3039	0.69	0.1176
	2-oleoylglycerophosphoethanolamine*	1.11	0.4603	0.86	0.7692	0.78	0.3043
	1-palmitoleoylglycerophosphoethanolamine*	0.92	0.7456	0.72	0.0862	0.78	0.1593
	2-palmitoleoylglycerophosphoethanolamine*	1.12	0.5812	0.93	0.7788	0.83	0.4066
	1-linoleoylglycerophosphoethanolamine*	0.93	0.8227	0.68	0.0801	0.73	0.124
	2-linoleoylglycerophosphoethanolamine*	0.89	0.8429	0.71	0.2707	0.8	0.3643
	1-palmitoylglycerophosphoinositol*	0.68	0.1929	0.7	0.2479	1.02	0.8797
	1-palmitoleoylglycerophosphoinositol*	1.46	0.0587	0.91	0.6389	0.62	0.0204
	2-palmitoleoylglycerophosphoinositol*	0.61	0.201	0.87	0.7167	1.43	0.355
	1-stearoylglycerophosphoinositol	0.88	0.8131	0.7	0.2314	0.8	0.3341
	1-oleoylglycerophosphoinositol*	1.05	0.6959	0.84	0.525	0.8	0.3072
	2-oleoylglycerophosphoinositol*	1.06	0.8309	0.95	0.8429	0.9	0.6808
	1-linoleoylglycerophosphoinositol*	1.33	0.1854	0.79	0.3332	0.59	0.0255
	1-linolenoylglycerophosphoinositol*	1.32	0.2495	0.66	0.0454	0.5	0.0025
	1-stearoylglycerophosphoserine*	1.04	0.8754	0.52	0.1763	0.51	0.133
	1-oleoylglycerophosphoserine	1.43	0.141	1.02	0.9946	0.71	0.1428
	2-oleoylglycerophosphoserine*	1.63	0.5376	1.02	0.7458	0.62	0.3489
	1-palmitoylglycerophosphoglycerol*	0.68	0.0799	0.67	0.0889	0.99	0.9573
	oleoyl-linoleoyl-glycerophosphoinositol (1)*	0.81	0.0002	0.85	0.0036	1.05	0.2915
	palmitoyl-linoleoyl-glycerophosphoinositol (1)*	0.84	0.0052	0.96	0.4964	1.14	0.0283
Glycerolipid Metabolism	glycerol	0.94	0.4646	0.86	0.0756	0.92	0.2827
	glycerol 3-phosphate (G3P)	0.91	0.4834	0.85	0.1753	0.93	0.5044
Monoacylglycerol	1-myristoylglycerol (1-monomyristin)	0.59	0.0459	0.53	0.0229	0.89	0.7589
	2-myristoylglycerol (2-monomyristin)	1.07	0.4355	0.93	0.7445	0.87	0.6482
	1-pentadecanoylglycerol (1-monopentadecanoin)	0.94	0.769	0.88	0.6785	0.93	0.9036
	1-palmitoylglycerol (1-monopalmitin)	0.52	0.0139	0.61	0.0655	1.18	0.4968
	2-palmitoylglycerol (2-monopalmitin)	0.79	0.5732	1.13	0.588	1.43	0.2721
	1-margaroylglycerol (1-monoheptadecanoin)	0.93	0.6049	0.96	0.9742	1.04	0.6275
	1-oleoylglycerol (1-monoolein)	0.74	0.2149	0.69	0.153	0.94	0.8446
	2-oleoylglycerol (2-monoolein)	0.63	0.2361	0.7	0.431	1.1	0.6854
	1-linoleoylglycerol (1-monolinolein)	0.72	0.2743	0.58	0.0677	0.8	0.4444
	2-linoleoylglycerol (2-monolinolein)	0.58	0.28	0.56	0.2405	0.96	0.9234
	1-linolenoylglycerol	0.73	0.3343	0.54	0.0397	0.74	0.2552
	oleoyl-linoleoyl-glycerol	1.06	0.6595	1.26	0.1998	1.18	0.3945
Sphingolipid Metabolism	N-palmitoyl-sphingosine*	0.95	0.4785	0.95	0.6623	1	0.7842
	palmitoleoyl sphingomyelin*	1	0.9793	1	1	1	0.9793
Mevalonate Metabolism	3-hydroxy-3-methylglutarate	0.87	0.0431	0.83	0.0087	0.95	0.5025
Sterol	beta-sitosterol	0.95	0.3626	0.8	0.0107	0.84	0.0849
	campesterol	0.97	0.6724	0.9	0.2573	0.93	0.4733
	ergosterol	0.95	0.4209	0.92	0.323	0.97	0.8519
Purine Metabolism, (Hypo)Xanthine/Inosine containing	inosine 5'-monophosphate (IMP)	1.34	0.1315	1.07	0.449	0.8	0.4417
	inosine	1.08	0.2215	1.1	0.139	1.01	0.7895
	hypoxanthine	0.78	0.2594	0.67	0.0464	0.86	0.3654
	xanthine	0.96	0.7858	0.86	0.1487	0.9	0.2372
	xanthosine 5'-monophosphate (xmp)	0.93	0.7784	1.84	0.0086	1.97	0.0041
	xanthosine	0.66	0.4259	0.53	0.1527	0.79	0.5162
	2'-deoxyinosine	1.1	0.2727	0.68	0.3277	0.62	0.0422
	urate	0.83	0.0033	0.78	0.0002	0.94	0.3479
	allantoin	1.31	0.0204	0.95	0.6843	0.72	0.0074
Purine Metabolism, Adenine containing	adenosine 5'-monophosphate (AMP)	1.29	0.1254	1.06	0.4594	0.82	0.4171
	adenosine 3'-monophosphate (3'-AMP)	1.13	0.5169	0.97	0.9322	0.86	0.4639
	adenosine 3',5'-cyclic monophosphate (cAMP)	0.53	0.2882	1.78	0.0867	3.34	0.0074
	adenosine 3',5'-diphosphate	2.29	0.0083	2.24	0.0136	0.98	0.8417
	adenosine	1.74	0.0023	1.49	0.014	0.86	0.4876
	adenine	0.96	0.762	0.94	0.7223	0.98	0.9579
	N1-methyladenosine	0.86	0.8208	0.61	0.1097	0.72	0.1665
	N6-methyladenosine	0.9	0.1289	0.77	0.0002	0.85	0.0121
	N6,N6-dimethyladenosine	0.74	0.0325	0.55	0.0001	0.75	0.0429
	N6-carbamoylthreonyladenosine	0.78	0.3611	0.64	0.0863	0.82	0.4074
	N6-succinyladenosine	1.06	0.5907	1.35	0.0129	1.28	0.0453
Purine Metabolism, Guanine containing	guanosine 5'- monophosphate (5'-GMP)	1.07	0.5524	1.28	0.1885	1.2	0.4638
	guanosine 3'-monophosphate (3'-GMP)	1.22	0.2703	1.17	0.3194	0.95	0.9129
	guanosine	0.99	0.8853	0.93	0.1705	0.94	0.2181
	guanine	0.95	0.8121	1.21	0.8726	1.27	0.6909
	7-methylguanine	0.97	0.743	0.59	0.2194	0.61	0.1228
	2'-O-methylguanosine	0.71	0.197	0.51	0.0075	0.72	0.1377
	7-methylguanosine	1.19	0.1455	1.03	0.6732	0.86	0.2951
	N1-methylguanosine	0.88	0.7293	0.64	0.0698	0.73	0.1372
	N2-methylguanosine	0.98	0.7184	0.62	0.1124	0.63	0.0542
	N2,N2-dimethylguanosine	0.9	0.7995	0.55	0.2507	0.61	0.1633
	N2,N2-dimethylguanine	0.76	0.0048	0.64	2.6925e-05	0.83	0.0797
	2'-deoxyguanosine	1.16	0.1805	0.83	0.9285	0.71	0.154
Pyrimidine Metabolism, Orotate containing	N-carbamoylaspartate	0.37	0.0007	1.24	0.2608	3.3	2.4205e-05
	orotate	0.95	0.7727	0.91	0.4688	0.95	0.6617
Pyrimidine Metabolism, Uracil containing	uridine 5'-triphosphate (UTP)	0.75	0.2967	0.43	0.2182	0.58	0.847
	uridine 5'-diphosphate (UDP)	0.98	0.9237	0.85	0.5933	0.87	0.5292
	uridine 5'-monophosphate (UMP)	0.86	0.3998	0.64	0.0867	0.74	0.3694
	uridine-3'-monophosphate (3'-UMP)	1.21	0.2657	1.29	0.0668	1.07	0.4523
	uridine-2',3'-cyclic monophosphate	1.15	0.2329	1.23	0.0811	1.07	0.5646
	uridine	0.94	0.3206	0.9	0.1166	0.96	0.5517
	uracil	0.94	0.9434	0.78	0.119	0.83	0.1358
	pseudouridine	0.86	0.6948	0.61	0.0385	0.71	0.0883
	5-methyluridine (ribothymidine)	0.97	0.7776	0.63	0.0813	0.64	0.0449
	5,6-dihydrouracil	0.32	4.0139e-05	0.48	0.0061	1.52	0.0863
	2'-deoxyuridine	0.97	0.3426	0.74	0.845	0.76	0.2542
	3-ureidopropionate	0.49	4.1673e-07	0.49	1.6775e-06	1.02	0.6535
	beta-alanine	0.66	0.0162	0.65	0.0174	0.98	0.9766
	N-acetyl-beta-alanine	1.02	0.7976	0.82	0.0146	0.81	0.0077
Pyrimidine Metabolism, Cytidine containing	cytidine triphosphate	0.49	0.024	0.43	0.0698	0.89	0.629
	cytidine diphosphate	1.2	0.25	1.07	0.6012	0.89	0.5251
	cytidine 5'-monophosphate (5'-CMP)	1.65	0.1013	1.38	0.3511	0.83	0.4658
	cytosine-2',3'-cyclic monophosphate	0.88	0.9468	0.9	0.9972	1.02	0.9496
	cytidine	1.06	0.42	1.08	0.2863	1.02	0.7912
	cytosine	1.02	0.9923	0.55	0.1459	0.54	0.1484
	2'-deoxycytidine 5'-monophosphate	0.97	0.9436	0.59	0.0238	0.61	0.0201
	2'-deoxycytidine	0.9	0.9316	0.75	0.5602	0.83	0.619
Pyrimidine Metabolism, Thymine containing	thymidine 5'-monophosphate	0.73	0.3094	0.73	0.5637	1	0.6567
	thymidine	0.96	0.9053	0.78	0.2967	0.81	0.2462
	thymine	1.03	0.3922	0.59	0.5348	0.57	0.1442
	3-aminoisobutyrate	0.82	0.0611	0.71	0.0043	0.87	0.2733
Purine and Pyrimidine Metabolism	methylphosphate	0.96	0.569	0.87	0.1431	0.9	0.3626
Nicotinate and Nicotinamide Metabolism	nicotinate	0.91	0.571	0.77	0.0746	0.86	0.2142
	nicotinate ribonucleoside	0.76	0.2711	0.7	0.1214	0.91	0.6421
	nicotinamide	0.99	0.9504	0.82	0.1664	0.82	0.1488
	nicotinamide ribonucleotide (NMN)	0.96	0.6639	0.94	0.5896	0.98	0.9161
	nicotinamide riboside	0.85	0.1347	0.92	0.5535	1.09	0.3574
	nicotinamide adenine dinucleotide (NAD+)	1.18	0.304	0.98	0.993	0.84	0.3081
	nicotinate adenine dinucleotide (NAAD+)	0.96	0.7568	0.81	0.1556	0.85	0.2624
	6-hydroxynicotinate	1.1	0.3599	0.8	0.1326	0.72	0.0186
	trigonelline (N'-methylnicotinate)	1.39	0.06	1.36	0.0741	0.98	0.9194
Riboflavin Metabolism	riboflavin (Vitamin B2)	0.9	0.0282	0.86	0.0053	0.96	0.5008
	flavin adenine dinucleotide (FAD)	1.14	0.1449	1.01	0.9511	0.88	0.1618
	flavin mononucleotide (FMN)	0.94	0.3951	0.96	0.5997	1.02	0.7424
Pantothenate and CoA Metabolism	pantothenate	0.92	0.1113	0.85	0.003	0.92	0.1287
Ascorbate and Aldarate Metabolism	threonate	1.08	0.5625	1.03	0.7703	0.96	0.7732
	arabonate	1.1	0.2993	1	0.9285	0.9	0.3421
	gulonic acid*	0.81	0.0832	0.84	0.167	1.04	0.7124
Tocopherol Metabolism	gamma-tocopherol	0.93	0.9627	0.76	0.3524	0.81	0.3767
Biotin Metabolism	biotin	0.81	0.0048	0.78	0.0013	0.96	0.6363
Tetrahydrobiopterin Metabolism	biopterin	0.69	6.488e-05	0.61	4.9973e-07	0.88	0.1207
Pterin Metabolism	isoxanthopterin	0.43	7.9495e-08	0.36	6.8777e-10	0.83	0.1186
	pterin	0.55	3.399e-08	0.5	9.8481e-10	0.9	0.24
Hemoglobin and Porphyrin Metabolism	biliverdin	1.43	0.3609	1.2	0.4688	0.84	0.8478
Thiamine Metabolism	thiamin (Vitamin B1)	0.87	0.1053	0.92	0.3688	1.05	0.4575
	thiamin diphosphate	0.65	0.0896	0.79	0.2671	1.21	0.5409
Vitamin B6 Metabolism	pyridoxal	0.88	0.4578	0.89	0.7135	1.01	0.7058
	pyridoxate	0.81	0.3945	0.73	0.1605	0.9	0.5715
Benzoate Metabolism	hippurate	0.73	0.0524	0.56	0.0014	0.77	0.1508
	4-hydroxyhippurate	1.71	0.0648	1.39	0.2244	0.81	0.5077
	benzoate	0.83	0.2165	0.85	0.3761	1.03	0.7198
	4-hydroxybenzoate	0.96	0.6826	0.77	0.0119	0.8	0.0315
	3,4-dihydroxybenzoate	0.96	0.8488	0.59	0.2212	0.61	0.1594
	methyl-4-hydroxybenzoate	1.05	0.7559	0.83	0.1144	0.79	0.0613
	p-aminobenzoate (PABA)	1.09	0.4397	1.16	0.2184	1.06	0.6403
Food Component/Plant	diaminopimelate	1.61	0.0232	1.53	0.0446	0.95	0.7729
	1-kestose	1.45	0.008	2.17	6.6652e-06	1.49	0.0191
	2,3-dihydroxyisovalerate	0.91	0.7168	1.02	0.7055	1.13	0.4602
	2-isopropylmalate	0.77	0.0734	0.77	0.076	1	0.9867
	2-oxindole-3-acetate	0.98	0.8922	0.63	0.001	0.65	0.0014
	3,4-dihydroxyphenylethanol	1.18	0.6933	1.58	0.6161	1.33	0.9144
	gluconate	0.88	0.0603	0.92	0.273	1.05	0.4139
	erythritol	2.38	0.0122	3.22	0.0008	1.35	0.3101
	quinate	0.83	0.3019	0.68	0.0359	0.82	0.2647
	stachydrine	1.13	0.3391	1.06	0.6596	0.94	0.6029
	methyl glucopyranoside (alpha + beta)	0.99	0.9825	1.04	0.6496	1.05	0.6654
